# Supplementary material for: Comparative Pathology of Domestic Pigs and Wild Boar Infected with the Moderately Virulent African Swine Fever Virus Strain “Estonia 2014”
Source: PubMed Central journal article supplement (PMC7459997; doi:10.3390/pathogens9080662), 2020-08-16
Supplement: pathogens-09-00662-s001.pdf [file pathogens-09-00662-s001.pdf]

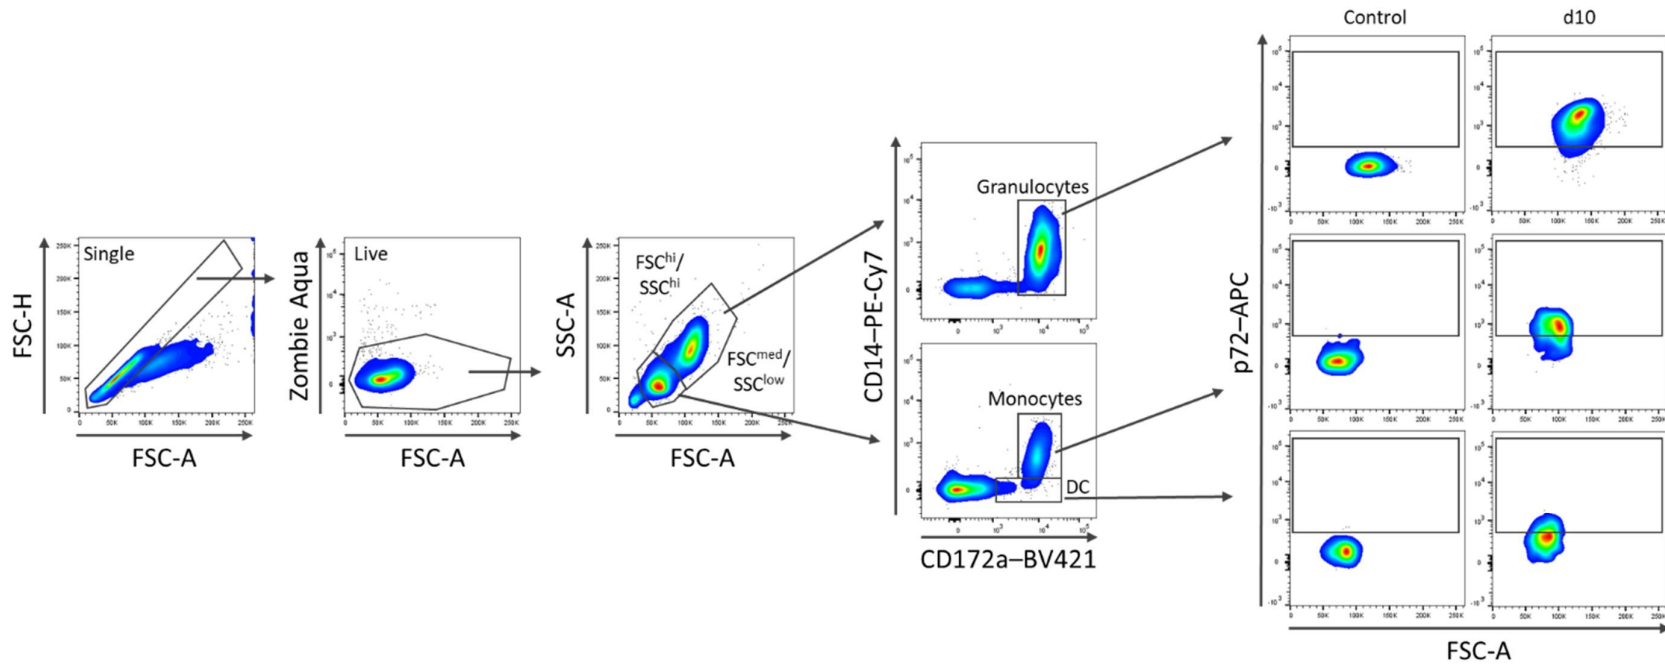

**Supplementary figure 1.** Gating strategy for the identification of infected myeloid cells by flow cytometry. Single cells were identified by FSC-H vs. FSC-A gating. Subsequently, dead cells were excluded using Zombie Aqua. Single, live cells were further subdivided into  $FSC^{hi}/SSC^{hi}$  and  $FSC^{med}/SSC^{low}$  cells.  $CD172a^{+}/CD14^{+}$  cells among  $FSC^{hi}/SSC^{hi}$  in the blood were identified as granulocytes. In all tissues, monocytes and dendritic cells (DC) were identified as  $CD172a^{+}/CD14^{+}$  and  $CD172a^{+}/CD14^{-}$ , respectively, among  $FSC^{med}/SSC^{low}$  cells. p72 expression was analysed of each myeloid cell subset.

Supplementary table 1. Temperature profiles of control and infected domestic pigs from 0 to 10 days pi.

|       | 0 d pi | 1 d pi | 2 d pi | 3 d pi | 4 d pi | 5 d pi | 6 d pi | 7 d pi | 8 d pi | 9 d pi | 10 d pi |
|-------|--------|--------|--------|--------|--------|--------|--------|--------|--------|--------|---------|
| Co 1  | 38,9   | -      | -      | -      | -      | -      | -      | -      | -      | -      | -       |
| Co 2  | 38,9   | -      | -      | -      | -      | -      | -      | -      | -      | -      | -       |
| DP 30 | 38,2   | 38,8   | 39,3   | 39,1   | 38,3   | -      | -      | -      | -      | -      | -       |
| DP 31 | 39,3   | 39,2   | 39,5   | 39,7   | 38,7   | -      | -      | -      | -      | -      | -       |
| DP 39 | 38,3   | 38,4   | 39,0   | 38,4   | 39,0   | -      | -      | -      | -      | -      | -       |
| DP 35 | 39,1   | 38,8   | 39,3   | 38,2   | 38,1   | 39,3   | 40,6   | 40,7   | -      | -      | -       |
| DP 37 | 39,4   | 39,2   | 39,1   | 39,0   | 38,5   | 39,9   | 41,7   | 41,0   | -      | -      | -       |
| DP 40 | 38,8   | 38,8   | 39,0   | 38,9   | 38,1   | 39,8   | 41,2   | 41,8   | -      | -      | -       |
| DP 32 | 38,8   | 39,0   | 39,1   | 39,3   | 39,0   | 39,7   | 41,6   | 41,2   | 40,9   | 40,2   | 39,2    |
| DP 33 | 38,8   | 38,5   | 39,0   | 38,9   | 38,5   | 39,6   | 40,1   | 40,9   | 40,4   | 40,8   | 40,6    |
| DP 34 | 38,6   | 39,0   | 38,9   | 39,2   | 39,1   | 39,6   | 41,1   | 41,3   | 40,2   | 40,2   | 40,1    |
